# Supplementary material for: Atomic layer deposition of ternary ruthenates by combining metalorganic precursors with RuO4 as the co-reactant
Source: Royal Society of Chemistry journal article supplement (doi:10.1039/d1dt03543f), 2021-11-18
Supplement: d1dt03543f1.pdf [file d1dt03543f1.pdf]

### --- Supplementary Information ---

## Atomic layer deposition of ternary ruthenates by combining metalorganic precursors with RuO<sub>4</sub> as the co-reactant

Matthias M. Minjauw,<sup>a</sup> Ji-Yu Feng,<sup>a</sup> Timo Sajavaara,<sup>b</sup> Christophe Detavernier<sup>a</sup>, Jolien Dendooven<sup>\*a</sup>

<sup>a</sup>Department of Solid State Sciences, COCOON Research Group, Ghent University, Krijgslaan 281 / S1, 9000 Ghent, Belgium. E-mail: Jolien.Dendooven@UGent.be

<sup>b</sup>Physics Department, University of Jyväskylä, Finland.

### Supplementary Figures

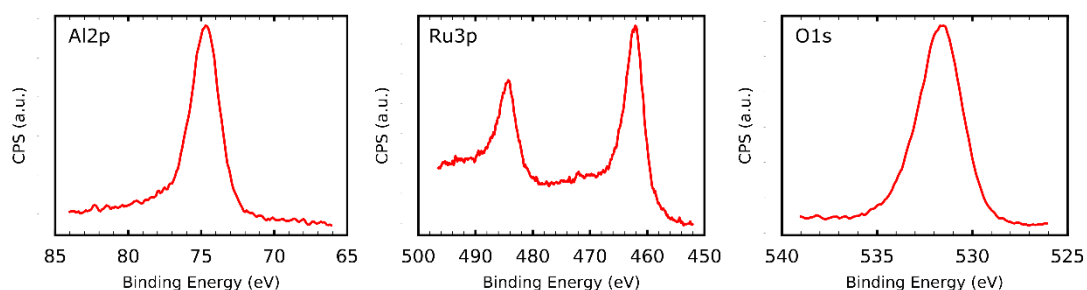

**Fig. S1.** XPS spectra acquired after 4000 s of depth profiling using a 1 kV Ar<sup>+</sup> ion beam on a thin film deposited by the TMA/RuO<sub>4</sub> process.

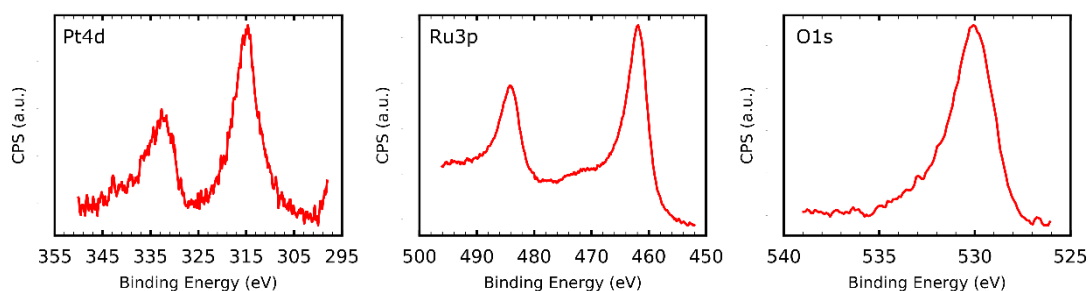

**Fig. S2.** XPS spectra acquired after 125 s of depth profiling using a 3 kV Ar<sup>+</sup> ion beam on a thin film deposited by the MeCpPtMe<sub>3</sub>/RuO<sub>4</sub> process.
